# Supplementary material for: The second highest chromosome count among vertebrates is observed in cultured sturgeon and is associated with genome plasticity
Source: Springer Nature journal article supplement (doi:10.1186/s12711-016-0194-0), 2016-02-11
Supplement: MOESM2 [file 12711_2016_194_MOESM2_ESM.pdf]

| Species                              | Family           | DNA content<br>(pg/nuclei) | Chromosome<br>number | References    |
|--------------------------------------|------------------|----------------------------|----------------------|---------------|
| <b>Actinopterygii</b>                |                  |                            |                      |               |
| <i>Ptychobarbus dipogon</i>          | Cyprinidae       | -                          | 446                  | [1]           |
| <i>Acipenser baerii</i>              | Acipenseridae    | 15.02                      | 437                  | present study |
| <i>Acipenser mikadoi</i>             | Acipenseridae    | 12.9                       | 402                  | [2*, 3]       |
| <i>Acipenser brevirostrum</i>        | Acipenseridae    | 13.07                      | 372                  | [4, 5*]       |
| <i>Acipenser baerii</i>              | Acipenseridae    | 12.7                       | 368                  | [6*, 7]       |
| <i>Acipenser transmontanus</i>       | Acipenseridae    | 9.46                       | 271                  | [5*, 8]       |
| <i>Huso dauricus</i>                 | Acipenseridae    | 8.3                        | 268                  | [9*, 10]      |
| <i>Acipenser schrenckii</i>          | Acipenseridae    | 8.2                        | 266                  | [9*, 10]      |
| <i>Carassius auratus langsdorfii</i> | Cyprinidae       | -                          | 204                  | [11]          |
| <i>Carassius auratus auratus</i>     | Cyprinidae       | 5.12                       | 150                  | [12]          |
| <i>Corydoras aeneus</i>              | Callichthyidae   | 6.6                        | 134                  | [13]          |
| <b>Myxini</b>                        |                  |                            |                      |               |
| <i>Eptatretus burgeri</i>            | Myxinidae        | 6.0                        | 36                   | [14*, 15]     |
| <i>Paramyxine atami</i>              | Myxinidae        | -                          | 34                   | [14]          |
| <b>Petromyzontida</b>                |                  |                            |                      |               |
| <i>Geotria australis</i>             | Geotriidae       | 3.08                       | 180                  | [16*, 17]     |
| <i>Lethenteron reissneri</i>         | Petromyzontidae  | -                          | 174                  | [18]          |
| <b>Chondrichthyes</b>                |                  |                            |                      |               |
| <i>Notorynchus cepedianus</i>        | Notorynchidae    | 8.8                        | 104                  | [19]          |
| <i>Heterodontus francisci</i>        | Heterodontidae   | 17.5                       | 102                  | [19]          |
| <b>Sarcopterygii</b>                 |                  |                            |                      |               |
| <i>Protopterus dolloi</i>            | Protopteridae    | 163.2                      | 68                   | [20]          |
| <i>Latimeria chalumnae</i>           | Latimeriidae     | 7.2                        | 48                   | [21*, 22]     |
| <b>Amphibia</b>                      |                  |                            |                      |               |
| <i>Xenopus longipes</i>              | Pipidae          | -                          | 108                  | [23]          |
| <i>Xenopus ruwenzoriensis</i>        | Pipidae          | 7.95                       | 108                  | [24*, 25]     |
| <b>Reptilia</b>                      |                  |                            |                      |               |
| <i>Platemys platycephala</i>         | Chelidae         | -                          | 96                   | [26]          |
| <i>Carettochelys insculpta</i>       | Carettochelyidae | -                          | 68                   | [27]          |
| <b>Aves</b>                          |                  |                            |                      |               |
| <i>Alcedo atthis</i>                 | Alcedinidae      | 2.8                        | 138                  | [28, 29*]     |
| <i>Upupa epops</i>                   | Upupidae         | 2.56                       | 126                  | [28, 30*]     |
| <b>Mammalia</b>                      |                  |                            |                      |               |
| <i>Tympanoctomys barrerae</i>        | Octodontidae     | 16.8                       | 102                  | [31, 32*]     |
| <i>Ichthyomys pittieri</i>           | Cricetidae       | -                          | 92                   | [33]          |

## References

1. Yu XY, Yu XJ. A schizothoracin fish species, *Diptychus dipogon*, with very high number of chromosomes *Chrom Inform Serv.* 1990;48:17-8.
2. Zhou H, Fujimoto T, Adachi S, Yamaha E, Arai K. Genome size variation estimated by flow cytometry in *Acipenser mikadoi*, *Huso dauricus* in relation to other species of *Acipenseriformes*. *J Appl Ichthyol.* 2011;27:484-91.
3. Zhou H, Fujimoto T, Adachi S, Abe S, Yamaha E, Arai K. Molecular cytogenetic study on the ploidy status in *Acipenser mikadoi*. *J Appl Ichthyol.* 2013;29:51-5.
4. Kim DS, Nam YK, Noh JK, Park CH, Chapman FA. Karyotype of North American shortnose sturgeon *Acipenser brevirostrum* with the highest chromosome number in *Acipenseriformes*. *Ichthyol Res.* 2005;52:94-7.
5. Blacklidge KH, Bidwell CA. Three ploidy levels indicated by genome quantification in *Acipenseriformes* of North America *J Hered.* 1993;84:427-30.
6. Bytyutskyy D, Srp J, Flajšhans M. Use of Feulgen image analysis densitometry to study the effect of genome size on nuclear size in polyploid sturgeons. *J Appl Ichthyol.* 2012;28:704-8.
7. Havelka M, Hulák M, Ráb P, Rábová M, Lieckfeldt D, Ludwig A, Rodina M, Gela D, Pšenička M, Bytyutskyy D, Flajšhans M. Fertility of a spontaneous triploid Siberian sturgeon, *Acipenser baerii*. *BMC Genetics.* 2014;15:5.
8. Van Eenennaam AL, Murray JD, Medrano JF. Mitotic analysis of the North American white sturgeon, *Acipenser transmontanus* Richardson (Pisces, Acipenseridae), a fish with a very high chromosome number. *Genome.* 1998;41:266-71.
9. Zhou H, Fujimoto T, Adachi S, Yamaha E, Arai K. Genome size variation estimated by flow cytometry in *Acipenser mikadoi*, *Huso dauricus* in relation to other species of *Acipenseriformes*. *J Appl Ichthyol.* 2011;27:484-91.
10. Vasil'ev VP, Vasil'eva ED, Shedko SV, Novomodny GV. How many times has polyploidization occurred during acipenserid evolution? New data on the karyotypes of sturgeons (*Acipenseridae*, *Actinopterygii*) from the Russian Far East. *J Ichthyol.* 2010;50:950-9.

11. Kobayasi H, Kawashima Y, Takeuchi N. Comparative chromosome studies in the genus *Carassius*, especially with a finding of polyploidy in the ginbuna (*C. auratus langsdorfii*). *Japan J Ichthyol.* 1970;17:153-60. (in Japanese with English abstract).
12. Suzuki A, Taki Y, Mochizuki M, Hirata J. Chromosomal speciation in Eurasian and Japanese Cyprinidae (Pisces, Cypriniformes) *Cytobios.* 1995;83:171-86.
13. Turner BJ, Difffoot N, Rasch EM. The callichthyid catfish *Corydoras aeneus* is an unresolved diploid-tetraploid sibling species complex. *Ichthyological Exploration of Freshwaters.* 1992;3:17-23.
14. Nakai Y, Kubota S, Kohno S. Chromatin diminution and chromosome elimination in four Japanese hagfish species. *Cytogenet Cell Genet.* 1991;56(3-4):196-8.
15. Kohno S, Nakai Y, Satoh S, Yoshida M, Kobayashi H. Chromosome elimination in the Japanese hagfish, *Eptatretus burgeri* (Agnatha, Cyclostomata). *Cytogenet Cell Genet.* 1986;41:209-14.
16. Robinson ES, Potter IC, Atkin NB. The nuclear DNA content of lampreys. *Experientia.* 1975;31:912-3.
17. Robinson ES, Potter IC. The chromosomes of the Southern Hemispheric Lamprey, *Geotria australis* Gray. *Experientia.* 1981;37:239-240.
18. Sasaki M, Hitotsumachi S. Notes of the chromosomes of a fresh water lamprey *Entosphenus ressnieri* (Cyclostomata). *Chrom Inform Serv.* 1967;8:22-4.
19. Schwartz FJ, Maddock MB. Comparisons of karyotypes and cellular DNA contents within and between major lines of elasmobranch In: Uyeno T, Arai R, Taniuchi T, Matsuura K, editors. *Indo-Pacific Fish Biology.* Tokyo, Japan: Ichthyological Society of Japan; 1986. p. 148-157.
20. Vervoort A. Tetraploidy in *Protopterus* (Dipnoi). *Experientia.* 1980;36:294-5.
21. Cimino MC, Bahr GF. The nuclear DNA content and chromatin ultrastructure of the coelacanth *Latimeria chalumnae*. *Exp Cell Res.* 1974;88:263-72.
22. Bogart JP, Balon EK, Bruton MN. The chromosomes of the living coelacanth and their remarkable similarity to those of one of the most ancient frogs. *J Hered.* 1994;85:322-5.
23. Loumont C, Kobel, HR. *Xenopus longipes* sp. nov., a new polyploid pipid from western Cameroon. *Revue Suisse de Zoologie.* 1991;98:731-8.
24. Thiébaud CH, Fischberg M. DNA content in the genus *Xenopus*. *Chromosoma.* 1977;59:253-7.

25. Tymowska J, Fischberg M. Chromosome complements of the genus *Xenopus*. *Chromosoma*. 1973;44:335-42.
26. Bull JJ, Legler JM. Karyotypes of side-necked turtles (Testudines, Pleurodira) *Canadian J Zool*. 1980;58:828-41.
27. Valenzuela N, Adams DC. Chromosome number and sex determination coevolve in turtles. *Evolution*. 2011;65-6:1808-13.
28. Bian X, Li Q. Studies on the Karyotypes of Birds. The 20 species of Climber birds (Aves). *Zoological Research*. 1989;10 (4): 309-17.
29. De Smet WHO, The nuclear Feulgen-DNA content of the vertebrates (especially reptiles), as measured by fluorescence cytophotometry, with notes on the cell and chromosome size. *Acta Zoologica et Pathologica Antverpiensia*. 1981;76:119-67.
30. Wright NA, Gregory TR, Witt CC. Metabolic 'engines' of flight drive genome size reduction in birds. *Proc R Soc B*. 2014;281:20132780.
31. Gallardo MH, González CA, Cebrián I. Molecular cytogenetics and allotetraploidy in the red vizcacha rat, *Tympanoctomys barrerae* (Rodentia, Octodontidae). *Genomics*. 2006;88 (2), 214-21.
32. Gallardo MH, Bickham JW, Honeycutt RL, Ojeda RA, Köhler N. Discovery of tetraploidy in a mammal. *Nature*. 1999;401:341.
33. Schmid M, Fernández-Badillo A, Feichtinger W, Steinlein C, Roman JI. On the highest chromosome number in mammals. *Cytogenet Genome Res*. 1988;49(4):305-8.
