# Supplementary material for: The second highest chromosome count among vertebrates is observed in cultured sturgeon and is associated with genome plasticity
Source: Genet Sel Evol. 2016 Feb 11;48:12. doi: 10.1186/s12711-016-0194-0 (PMC4751722; doi:10.1186/s12711-016-0194-0)
Supplement: Supplementary file 1 — 10.1186/s12711-016-0194-0 Genotyping results with highlighted private dam and sire microsatellite alleles observed at all analysed loci for parental individuals, and for pentaploid (5n) and heptaploid (7n) full siblings. [file 12711_2016_194_MOESM1_ESM.xls]

## Sheet: AfuG 135
Genotypes								Binary Codes
Sample Name	Marker	Allele 1	Allele 2	Allele 3	Allele 4	Allele 5		Sample Name	Marker	Allele 1	Allele 2	Allele 3	Allele 4	Allele 5
			Sire private		Dam private	Sire private					Sire private		Dam private	Sire private
A. baerii_dam_4n	Afu G 135	200		216	224			A. baerii_dam_4n	Afu G 135	-	0	-	1	0
A. baerii_sire_6n	Afu G 135	200	204	216		232		A. baerii_sire_6n	Afu G 135	-	1	-	0	1
7n_2239	Afu G 135	200	204	216	224			7n_2239	Afu G 135	-	1	-	1	0
7n_3615	Afu G 135	200	204	216	224	232		7n_3615	Afu G 135	-	1	-	1	1
7n_3933	Afu G 135	200	204	216				7n_3933	Afu G 135	-	1	-	0	0
7n_4217	Afu G 135	200		216		232		7n_4217	Afu G 135	-	0	-	0	1
7n_5399	Afu G 135	200		216				7n_5399	Afu G 135	-	0	-	0	0
7n_6631	Afu G 135	200		216	224	232		7n_6631	Afu G 135	-	0	-	1	1
7n_9887	Afu G 135	200		216	224	232		7n_9887	Afu G 135	-	0	-	1	1
								Total			3		4	4
5n_1	Afu G 135	200		216		232		5n_1	Afu G 135	-	0	-	0	1
5n_2	Afu G 135	200		216				5n_2	Afu G 135	-	0	-	0	0
5n_3	Afu G 135			216		232		5n_3	Afu G 135	-	0	-	0	1
5n_4	Afu G 135	200		216	224			5n_4	Afu G 135	-	0	-	1	0
5n_5	Afu G 135	200	204	216		232		5n_5	Afu G 135	-	1	-	0	1
5n_6	Afu G 135	200		216				5n_6	Afu G 135	-	0	-	0	0
5n_7	Afu G 135	200		216				5n_7	Afu G 135	-	0	-	0	0
								Total			1		1	3
								Summary of private alleles
								AfuG 135	5n		7n
								Total alleles	Sire	Dam	Sire	Dam
									4	1	7	4

## Sheet: AfuG 54
Genotypes							Binary Codes
Sample Name	Marker	Allele 1	Allele 2	Allele 3	Allele 4		Sample Name	Marker	Allele 1	Allele 2	Allele 3	Allele 4
			Sire private	Dam private	Dam private					Sire private	Dam private	Dam private
A. baerii_dam_4n	Afu G54	236		258	260		A. baerii_dam_4n	Afu G54	-	0	1	1
A. baerii_sire_6n	Afu G54	236	254				A. baerii_sire_6n	Afu G54	-	1	0	0
7n_2239	Afu G54	236		258			7n_2239	Afu G54	-	0	1	0
7n_3615	Afu G54	236	254	258			7n_3615	Afu G54	-	1	1	0
7n_3933	Afu G54	236	254	258			7n_3933	Afu G54	-	1	1	0
7n_4217	Afu G54	236		258	260		7n_4217	Afu G54	-	0	1	1
7n_5399	Afu G54	236	254	258			7n_5399	Afu G54	-	1	1	0
7n_6631	Afu G54	236	254	258	260		7n_6631	Afu G54	-	1	1	1
7n_9887	Afu G54	236		258	260		7n_9887	Afu G54	-	0	1	0
							Total			4	7	2
5n_1	Afu G54	236	254				5n_1	Afu G54	-	1	0	0
5n_2	Afu G54	236	254	258			5n_2	Afu G54	-	1	1	0
5n_3	Afu G54	236	254	258			5n_3	Afu G54	-	1	1	0
5n_4	Afu G54	236	254		260		5n_4	Afu G54	-	1	0	1
5n_5	Afu G54	236		258			5n_5	Afu G54	-	0	1	0
5n_6	Afu G54	236	254		260		5n_6	Afu G54	-	1	0	1
5n_7	Afu G54	236	254				5n_7	Afu G54	-	1	0	0
							Total			6	3	2
							Summary of private alleles
							AfuG 54	5n		7n
							Total alleles	Sire	Dam	Sire	Dam
								6	5	4	9

## Sheet: Aox 45
Genotypes										Binary Codes
Sample Name	Marker	Allele 1	Allele 2	Allele 3	Allele 4	Allele 5	Allele 6	Allele 7		Sample Name	Marker	Allele 1	Allele 2	Allele 3	Allele 4	Allele 5	Allele 6	Allele 7
		Sire private		Dam private	Sire private	Sire private		Sire private				Sire private		Dam private	Sire private	Sire private		Sire private
A. baerii_dam_4n	Aox 45		127	130			148			A. baerii_dam_4n	Aox 45	0	-	1	0	0	-	0
A. baerii_sire_6n	Aox 45	124	127		136	142	148	151		A. baerii_sire_6n	Aox 45	1	-	0	1	1	-	1
7n_2239	Aox 45		127			142	148			7n_2239	Aox 45	0	-	0	0	1	-	0
7n_3615	Aox 45	124		130		142	148			7n_3615	Aox 45	1	-	1	0	1	-	0
7n_3933	Aox 45	124	127	130		142	148			7n_3933	Aox 45	1	-	1	0	1	-	0
7n_4217	Aox 45		127	130	136	142	148	151		7n_4217	Aox 45	0	-	1	1	1	-	1
7n_5399	Aox 45		127	130	136		148	151		7n_5399	Aox 45	0	-	1	1	0	-	1
7n_6631	Aox 45		127			142	148	151		7n_6631	Aox 45	0	-	0	0	1	-	1
7n_9887	Aox 45	124		130	136		148	151		7n_9887	Aox 45	1	-	1	1	0	-	1
										Total		3		5	3	5		4
5n_1	Aox 45		127		136	142	148			5n_1	Aox 45	0	-	0	1	1	-	0
5n_2	Aox 45		127		136	142	148			5n_2	Aox 45	0	-	0	1	1	-	0
5n_3	Aox 45	124	127	130	136		148			5n_3	Aox 45	1	-	1	1	0	-	0
5n_4	Aox 45	124		130		142	148	151		5n_4	Aox 45	1	-	1	0	1	-	1
5n_5	Aox 45		127		136	142	148	151		5n_5	Aox 45	0	-	0	1	1	-	1
5n_6	Aox 45	124	127				148	151		5n_6	Aox 45	1	-	0	0	0	-	1
5n_7	Aox 45		127		136	142	148			5n_7	Aox 45	0	-	0	1	1	-	0
										Total		3		2	5	5		3
										Summary of private alleles
										Aox 45	5n		7n
										Total alleles	Sire	Dam	Sire	Dam
											16	2	15	5

## Sheet: AciG35
Genotypes								Binary Codes
Sample Name	Marker	Allele 1	Allele 2	Allele 3	Allele 4	Allele 5		Sample Name	Marker	Allele 1	Allele 2	Allele 3	Allele 4	Allele 5
		Dam private								Dam private
A. baerii_dam_4n	AciG35	284	288	292	296	304		A. baerii_dam_4n	AciG35	1	-	-	-	-
A. baerii_sire_6n	AciG35		288	292	296	304		A. baerii_sire_6n	AciG35	0	-	-	-	-
7n_2239	AciG35	284	288	292	296	304		7n_2239	AciG35	1	-	-	-	-
7n_3615	AciG35	284	288	292	296	304		7n_3615	AciG35	1	-	-	-	-
7n_3933	AciG35	284	288	292	296	304		7n_3933	AciG35	1	-	-	-	-
7n_4217	AciG35	284	288	292	296	304		7n_4217	AciG35	1	-	-	-	-
7n_5399	AciG35	284	288	292	296	304		7n_5399	AciG35	1	-	-	-	-
7n_6631	AciG35	284	288	292	296	304		7n_6631	AciG35	1	-	-	-	-
7n_9887	AciG35	284	288	292		304		7n_9887	AciG35	1	-	-	-	-
								Total		7
5n_1	AciG35		288	292	296	304		5n_1	AciG35	0	-	-	-	-
5n_2	AciG35		288	292	296	304		5n_2	AciG35	0	-	-	-	-
5n_3	AciG35			292		304		5n_3	AciG35	0	-	-	-	-
5n_4	AciG35	284		292	296	304		5n_4	AciG35	1	-	-	-	-
5n_5	AciG35	284	288	292	296	304		5n_5	AciG35	1	-	-	-	-
5n_6	AciG35	284	288	292	296	304		5n_6	AciG35	1	-	-	-	-
5n_7	AciG35		288	292	296	304		5n_7	AciG35	0	-	-	-	-
								Total		3
								Summary of private alleles
								AciG 35	5n		7n
								Total alleles	Sire	Dam	Sire	Dam
									0	3	0	7

## Sheet: Afu 68
Genotypes									Binary Codes
Sample Name	Marker	Allele 1	Allele 2	Allele 3	Allele 4	Allele 5	Allele 6		Sample Name	Marker	Allele 1	Allele 2	Allele 3	Allele 4	Allele 5	Allele 6
		Sire private		Dam private	Sire private						Sire private		Dam private	Sire private
A. baerii_dam_4n	Afu 68		152	160		200	232		A. baerii_dam_4n	Afu 68	0	-	1	0	-	-
A. baerii_sire_6n	Afu 68	140	152		180	200	232		A. baerii_sire_6n	Afu 68	1	-	0	1	-	-
7n_2239	Afu 68		152	160	180	200	232		7n_2239	Afu 68	0	-	1	1	-	-
7n_3615	Afu 68	140	152	160		200	232		7n_3615	Afu 68	1	-	1	0	-	-
7n_3933	Afu 68		152	160	180	200	232		7n_3933	Afu 68	0	-	1	1	-	-
7n_4217	Afu 68								7n_4217	Afu 68	0	-	1	0	-	-
7n_5399	Afu 68	140	152	160	180	200	232		7n_5399	Afu 68	1	-	1	1	-	-
7n_6631	Afu 68	140	152	160	180	200	232		7n_6631	Afu 68	1	-	1	1	-	-
7n_9887	Afu 68		152	160		200	232		7n_9887	Afu 68	0	-	1	0	-	-
									Total		3		7	4
5n_1	Afu 68	140	152		180	200			5n_1	Afu 68	1	-	0	1	-	-
5n_2	Afu 68	140		160	180	200			5n_2	Afu 68	1	-	1	1	-	-
5n_3	Afu 68		152		180		232		5n_3	Afu 68	0	-	0	1	-	-
5n_4	Afu 68		152	160		200			5n_4	Afu 68	0	-	1	0	-	-
5n_5	Afu 68	140	152	160	180		232		5n_5	Afu 68	1	-	1	1	-	-
5n_6	Afu 68			160			232		5n_6	Afu 68	0	-	1	0	-	-
5n_7	Afu 68	140		160		200	232		5n_7	Afu 68	1	-	1	0	-	-
									Total		4		5	4
									Summary of private alleles
									Afu 68	5n		7n
									Total alleles	Sire	Dam	Sire	Dam
										8	5	7	7

## Sheet: Spl 101
Genotypes								Binary Codes
Sample Name	Marker	Allele 1	Allele 2	Allele 3	Allele 4	Allele 5		Sample Name	Marker	Allele 1	Allele 2	Allele 3	Allele 4	Allele 5
		Dam private	Sire private	Sire private		Dam private				Dam private	Sire private	Sire private		Dam private
A. baerii_dam_4n	Spl101	284			308	320		A. baerii_dam_4n	Spl101	1	0	0	-	1
A. baerii_sire_6n	Spl101		300	304	308			A. baerii_sire_6n	Spl101	0	1	1	-	0
7n_2239	Spl101	284		304	308	320		7n_2239	Spl101	1	0	1	-	1
7n_3615	Spl101	284			308	320		7n_3615	Spl101	1	0	0	-	1
7n_3933	Spl101	284		304	308	320		7n_3933	Spl101	1	0	1	-	1
7n_4217	Spl101	284		304	308	320		7n_4217	Spl101	1	0	1	-	1
7n_5399	Spl101	284	300		308	320		7n_5399	Spl101	1	1	0	-	1
7n_6631	Spl101	284	300	304	308	320		7n_6631	Spl101	1	1	1	-	1
7n_9887	Spl101	284		304	308	320		7n_9887	Spl101	1	0	1	-	1
								Total		7	2	5		7
5n_1	Spl101			304	308	320		5n_1	Spl101	0	0	1	-	1
5n_2	Spl101	284	300		308			5n_2	Spl101	1	1	0	-	0
5n_3	Spl101			304	308	320		5n_3	Spl101	0	0	1	-	1
5n_4	Spl101		300		308	320		5n_4	Spl101	0	1	0	-	1
5n_5	Spl101	284	300	304	308	320		5n_5	Spl101	1	1	1	-	1
5n_6	Spl101				308	320		5n_6	Spl101	0	0	0	-	1
5n_7	Spl101	284	300	304	308	320		5n_7	Spl101	1	1	1	-	1
								Total		3	4	4		6
								Summary of private alleles
								Spl 101	5n		7n
								Total alleles	Sire	Dam	Sire	Dam
									8	9	7	14

## Sheet: Spl 163
Genotypes								Binary Codes
Sample Name	Marker	Allele 1	Allele 2	Allele 3	Allele 4	Allele 5		Sample Name	Marker	Allele 1	Allele 2	Allele 3	Allele 4	Allele 5
		Sire private	Sire private	Dam private	Sire private	Dam private				Sire private	Sire private	Dam private	Sire private	Dam private
A. baerii_dam_4n	Spl163			226		266		A. baerii_dam_4n	Spl163	0	0	1	0	1
A. baerii_sire_6n	Spl163	218	222		262			A. baerii_sire_6n	Spl163	1	1	0	1	0
7n_2239	Spl163	218		226	262	266		7n_2239	Spl163	1	0	1	1	1
7n_3615	Spl163	218	222		262	266		7n_3615	Spl163	1	1	0	1	1
7n_3933	Spl163	218	222			266		7n_3933	Spl163	1	1	0	0	1
7n_4217	Spl163	218		226	262	266		7n_4217	Spl163	1	0	1	1	1
7n_5399	Spl163		222	226	262	266		7n_5399	Spl163	0	1	1	1	1
7n_6631	Spl163	218		226	262	266		7n_6631	Spl163	1	0	1	1	1
7n_9887	Spl163	218		226	262	266		7n_9887	Spl163	1	0	1	1	1
								Total		6	3	5	6	7
5n_1	Spl163				262	266		5n_1	Spl163	0	0	0	1	1
5n_2	Spl163		222	226	262			5n_2	Spl163	0	1	1	1	0
5n_3	Spl163	218		226	262			5n_3	Spl163	1	0	1	1	0
5n_4	Spl163		222	226	262			5n_4	Spl163	0	1	1	1	0
5n_5	Spl163	218		226	262	266		5n_5	Spl163	1	0	1	1	1
5n_6	Spl163	218			262	266		5n_6	Spl163	1	0	0	1	1
5n_7	Spl163	218		226	262			5n_7	Spl163	1	0	1	1	0
								Total		4	2	5	7	3
								Summary of private alleles
								Spl 163	5n		7n
								Total alleles	Sire	Dam	Sire	Dam
									13	8	15	12

## Sheet: Spl 173
Genotypes								Binary Codes
Sample Name	Marker	Allele 1	Allele 2	Allele 3	Allele 4	Allele 5		Sample Name	Marker	Allele 1	Allele 2	Allele 3	Allele 4	Allele 5
					Sire private	Dam private							Sire private	Dam private
A. baerii_dam_4n	Spl173	224	236	240		252		A. baerii_dam_4n	Spl173	-	-	-	0	1
A. baerii_sire_6n	Spl173	224	236	240	244			A. baerii_sire_6n	Spl173	-	-	-	1	0
7n_2239	Spl173	224		240		252		7n_2239	Spl173	-	-	-	0	1
7n_3615	Spl173	224	236	240	244	252		7n_3615	Spl173	-	-	-	1	1
7n_3933	Spl173	224	236	240		252		7n_3933	Spl173	-	-	-	0	1
7n_4217	Spl173	224		240				7n_4217	Spl173	-	-	-	0	0
7n_5399	Spl173	224	236	240	244	252		7n_5399	Spl173	-	-	-	1	1
7n_6631	Spl173	224	236	240		252		7n_6631	Spl173	-	-	-	0	1
7n_9887	Spl173		236	240	244			7n_9887	Spl173	-	-	-	1	0
								Total					3	5
5n_1	Spl173	224		240		252		5n_1	Spl173	-	-	-	0	1
5n_2	Spl173	224	236	240	244			5n_2	Spl173	-	-	-	1	0
5n_3	Spl173		236	240	244			5n_3	Spl173	-	-	-	1	0
5n_4	Spl173	224		240	244			5n_4	Spl173	-	-	-	1	0
5n_5	Spl173	224	236	240				5n_5	Spl173	-	-	-	0	0
5n_6	Spl173	224		240				5n_6	Spl173	-	-	-	0	0
5n_7	Spl173	224		240		252		5n_7	Spl173	-	-	-	0	1
								Total					3	2
								Summary of private alleles
								Spl 173	5n		7n
								Total alleles	Sire	Dam	Sire	Dam
									3	2	3	5

## Sheet: Summary
Number of private alleles at analyzed loci
Loci	5n		7n
	Sire	Dam	Sire	Dam
AfuG_135	4	1	7	4
AfuG_54	6	5	4	9
Aox_45	16	2	15	5
AciG_35	0	3	0	7
Afu_68	8	5	7	7
Spl_101	8	9	7	14
Spl_163	13	8	15	12
Spl_173	3	2	3	5
Total	58	35	58	63
